# Supplementary material for: Antiplasmodial Activity of Vachellia xanthophloea (Benth.) P.J.H. Hurter (African Fever Tree) and Its Constituents
Source: MDPI journal article supplement (doi:10.3390/ph15040470), 2022-04-13
Supplement: s1 [file pharmaceuticals-1619319-supplementary.pdf › pharmaceuticals-1619319-supplementary.pdf]

## Supplementary materials

### Antiplasmodial activity of *Vachellia xanthophloea* (Benth.) P.J.H. Hurter (African fever tree) and its constituents

Nasir Tajuddeen<sup>1</sup>, Tarryn Swart<sup>2</sup>, Heinrich C. Hoppe<sup>2</sup>, and Fanie R. van Heerden<sup>1,\*</sup>

<sup>1</sup> School of Chemistry and Physics, University of KwaZulu-Natal, Private Bag X01, Scottsville 3209, Pietermaritzburg, South Africa 1; ntajuddeen@yahoo.com, vanheerdenf@ukzn.ac.za

<sup>2</sup> Department of Biochemistry & Microbiology, Rhodes University, Grahamstown 6140, South Africa; g10s2905@campus.ru.ac.za, h.hoppe@ru.ac.za

\* Correspondence: vanheerdenf@ukzn.ac.za (F.R. van Heerden); Tel.: +27 82 823 8642

**Abstract:** *Vachellia xanthophloea* is used in Zulu folk medicine as an antimalarial remedy. Moderate antiplasmodial activity was previously reported for the plant's extracts against D10 *Plasmodium falciparum*. This study aimed to identify the phytochemicals responsible for the antiplasmodial activity of the leaf extract. The compounds were isolated by chromatography and their structures were determined using spectroscopic and spectrometric methods. The antiplasmodial activity was evaluated using the parasite lactate dehydrogenase assay and the cytotoxicity was determined using the resazurin assay. The ethyl acetate fraction inhibited *P. falciparum* with  $IC_{50} = 10.6 \mu\text{g/mL}$  and showed minimal cytotoxicity (98% cell viability at  $33 \mu\text{g/mL}$ ). Chromatographic purification of this fraction afforded sixteen compounds, including two new flavonoids. Also, a 1:1 mixture of phytol and lupeol was isolated from the hexanes fraction. All the compounds are reported from *V. xanthophloea* for the first time. Among the isolated metabolites, methyl gallate displayed the best activity against *P. falciparum* ( $IC_{50} = 1.2 \mu\text{g/mL}$ ), with 68% viability of HeLa cells at  $10 \mu\text{g/mL}$ . Therefore, methyl gallate is responsible for the antiplasmodial activity of *V. xanthophloea* leaf extract and its presence in the leaf extract might account for the folkloric use of the plant as an antimalarial remedy.

**Keywords:** *Vachellia xanthophloea*; Fabaceae; flavonoids; methyl gallate; malaria; *Plasmodium*

#### *Spectroscopic data of the known compounds:*

2'-Hydroxy-3,7,8,4',5'-pentamethoxyflavone (**2**): pale-yellow solid, UV (MeOH/ACN):  $\lambda_{\text{max}}$  247, 344 nm;  $^1\text{H}$  NMR (500 MHz,  $\text{CDCl}_3$ ):  $\delta_{\text{H}}$  8.15 (1H, s, OH), 7.99 (1H, d,  $J=9.0$  Hz, H-5), 7.06 (1H, d,  $J=9.0$  Hz, H-6), 7.05 (1H, s, H-6'), 6.63 (1H, s, H-3'), 4.00 (3H, s,  $\text{OCH}_3$ ), 3.99 (3H, s,  $\text{OCH}_3$ ), 3.93 (3H, s,  $\text{OCH}_3$ ), 3.92 (3H, s,  $\text{OCH}_3$ ), 3.89 (3H, s,  $\text{OCH}_3$ ).  $^{13}\text{C}$  NMR (125 MHz,  $\text{CDCl}_3$ ):  $\delta_{\text{C}}$  173.4 (C-4), 156.6 (C-7), 155.2 (C-2), 153.7 (C-4'), 151.3 (C-2'), 150.1 (C-9), 143.5 (C-5'), 138.2 (C-3), 136.8 (C-8), 121.1 (C-5), 118.8 (C-10), 114.0 (C-6'), 108.9 (C-1'), 110.1 (C-6), 102.8 (C-3'), 61.5 ( $\text{OCH}_3$ -8), 61.9 ( $\text{OCH}_3$ -3), 56.1 ( $\text{OCH}_3$ -5'), 56.2 ( $\text{OCH}_3$ -4'), 56.5 ( $\text{OCH}_3$ -7). HPLC  $R_t$ : 24.101 min; HR-ESI-(+)-MS:  $m/z$  389.1248  $[\text{M}+\text{H}]^+$  (Calculated for  $\text{C}_{20}\text{H}_{21}\text{O}_8$ , 389.1236).

3-O-Methylquercetin (**4**): yellow solid, UV (MeOH/ACN):  $\lambda_{\text{max}}$  266, 373 nm;  $^1\text{H}$  NMR (400 MHz,  $\text{CD}_3\text{OD}$ ):  $\delta_{\text{H}}$  7.62 (1H, d,  $J=2.1$  Hz, H-2'), 7.52 (1H, dd,  $J=8.5, 2.1$  Hz, H-6'), 6.9 (1H, d,  $J=8.5$  Hz, H-5'), 6.38 (1H, d,  $J=1.9$  Hz, H-8), 6.19 (1H, d,  $J=1.9$  Hz, H-6), 3.78 (3H, s,  $\text{OCH}_3$ ).  $^{13}\text{C}$  NMR (100 MHz,  $\text{CD}_3\text{OD}$ ):  $\delta_{\text{C}}$  180.0 (C-4), 166.1 (C-7), 163.1 (C-5), 158.4 (C-9), 158.0 (C-2), 150.0 (C-4'), 146.5 (C-3'), 139.5 (C-3), 123.0 (C-6'), 122.3 (C-1'), 116.5 (C-5'), 116.4 (C-2'), 105.8 (C-10), 99.8 (C-6), 94.8 (C-8), 60.5 ( $\text{OCH}_3$ -3). HPLC  $R_t$ : 23.275 min; HR-ESI-(-)-MS:  $m/z$  315.0508  $[\text{M}-\text{H}]^-$  (Calculated for  $\text{C}_{16}\text{H}_{11}\text{O}_7$ , 315.0505).

Quercetin (**5**): yellow solid, UV (MeOH/ACN):  $\lambda_{\text{max}}$  254, 371 nm;  $^1\text{H}$  NMR (400 MHz,  $\text{CD}_3\text{OD}$ ):  $\delta_{\text{H}}$  7.73 (1H, d,  $J=1.9$  Hz, H-2'), 7.63 (1H, dd,  $J=8.4, 1.9$  Hz, H-6'), 6.88 (1H, d,  $J=8.4$  Hz, H-5'), 6.38 (1H, d,  $J=1.9$

Hz, H-8), 6.18 (1H, d,  $J=1.9$  Hz, H-6).  $^{13}\text{C}$  NMR (100 MHz,  $\text{CD}_3\text{OD}$ ):  $\delta_{\text{C}}$  177.3 (C-4), 166.0 (C-7), 162.5 (C-5), 158.3 (C-9), 148.8 (C-4'), 148.0 (C-2), 146.3 (C-3'), 137.2 (C-3), 124.2 (C-1'), 121.7 (C-6'), 116.3 (C-2'), 116.0 (C-5'), 104.5 (C-10), 99.4 (C-6), 94.5 (C-8). HPLC  $R_{\text{t}}$ : 22.136 min; HR-ESI(-)-MS:  $m/z$  301.0341  $[\text{M-H}]^-$  (Calculated for  $\text{C}_{15}\text{H}_9\text{O}_7$ , 301.0348).

(2*R*,3*R*)-Dihydroquercetin ((+)-taxifolin) (**6**): brown solid,  $[\alpha]_{\text{D}}^{24.9} +34.6$  ( $c=0.78$ , MeOH), UV (MeOH/ACN):  $\lambda_{\text{max}}$  298 nm;  $^1\text{H}$  NMR (400 MHz,  $\text{CD}_3\text{OD}$ ):  $\delta_{\text{H}}$  6.96 (1H, d,  $J=1.86$  Hz, H-2'), 6.85 (1H, dd,  $J=8.2$ , 1.86 Hz, H-6'), 6.8 (1H, d,  $J=8.2$  Hz, H-5'), 5.92 (d, 1H,  $J=2.2$  Hz, H-8), 5.88 (1H, d,  $J=2.2$  Hz, H-6), 4.91 (1H, d,  $J=11.5$  Hz, H-2), 4.49 (1H, d,  $J=11.5$  Hz, H-3).  $^{13}\text{C}$  NMR (100 MHz,  $\text{CD}_3\text{OD}$ ):  $\delta_{\text{C}}$  198.4 (C-4), 168.8 (C-5), 165.3 (C-7), 164.5 (C-9), 147.2 (C-4'), 146.3 (C-3'), 129.9 (C-1'), 120.9 (C-6'), 116.1 (C-2'), 115.9 (C-5'), 101.8 (C-10), 97.4 (C-6), 96.3 (C-8), 85.1 (C-2), 73.7 (C-3). HPLC  $R_{\text{t}}$ : 15.856 min; HR-ESI(-)-MS:  $m/z$  303.0517  $[\text{M-H}]^-$  (Calculated for  $\text{C}_{15}\text{H}_{11}\text{O}_7$ , 303.0505).

(+)-Catechin (**7**): brown solid,  $[\alpha]_{\text{D}}^{24.9} +7.1$  ( $c=0.68$ , MeOH), UV (MeOH/ACN):  $\lambda_{\text{max}}$  279 nm;  $^1\text{H}$  NMR (400 MHz,  $\text{CD}_3\text{OD}$ ):  $\delta_{\text{H}}$  6.83 (1H, d,  $J=1.8$  Hz, H-2'), 6.76 (1H, d,  $J=8.0$  Hz, H-5'), 6.72 (1H, dd,  $J=8.0$ , 1.8 Hz, H-6'), 5.93 (1H, d,  $J=2.3$  Hz, H-6), 5.86 (1H, d,  $J=2.3$  Hz, H-8), 4.57 (1H, d,  $J=7.5$  Hz, H-2), 3.98 (1H, dt,  $J=7.7$ , 5.3 Hz, H-3), 2.85 (1H, dd,  $J=16.0$ , 5.5 Hz, H-4a), 2.51 (1H, dd,  $J=16.5$ , 8.5 Hz, H-4b).  $^{13}\text{C}$  NMR (100 MHz,  $\text{CD}_3\text{OD}$ ):  $\delta_{\text{C}}$  157.8 (C-7), 157.6 (C-5), 156.9 (C-9), 146.2 (C-3' and C-4'), 132.2 (C-1'), 120.1 (C-6'), 116.1 (C-5'), 115.3 (C-2'), 100.9 (C-10), 96.4 (C-6), 95.5 (C-8), 82.8 (C-2), 68.8 (C-3), 28.5 (C-4). HPLC  $R_{\text{t}}$ : 9.039 min; HR-ESI(-)-MS:  $m/z$  289.0706  $[\text{M-H}]^-$  (Calculated for  $\text{C}_{15}\text{H}_{13}\text{O}_6$ , 289.0712).

Galocatechin (**8**): brown solid, UV (MeOH/ACN):  $\lambda_{\text{max}}$  270 nm;  $^1\text{H}$  NMR (400 MHz,  $\text{CD}_3\text{OD}$ ):  $\delta_{\text{H}}$  6.41 (2H, s, H-2',6'), 5.92 (1H, d,  $J=2.3$  Hz, H-6), 5.86 (1H, d,  $J=2.3$  Hz, H-8), 4.53 (1H, d,  $J=7.0$  Hz, H-2), 3.94 (1H, dt,  $J=7.0$ , 5.5 Hz, H-3), 2.81 (1H, dd,  $J=16.0$ , 5.5 Hz, H-4a), 2.51 (1H, dd,  $J=16.5$ , 8.5 Hz, H-4b).  $^{13}\text{C}$  NMR (100 MHz,  $\text{CD}_3\text{OD}$ ):  $\delta_{\text{C}}$  157.8 (C-7), 157.6 (C-5), 156.9 (C-9), 146.8 (C-3' and C-5'), 134.1 (C-4'), 131.7 (C-1'), 107.3 (C-2', C-6'), 100.8 (C-10), 96.3 (C-6), 95.5 (C-8), 82.8 (C-2), 68.8 (C-3), 28.1 (C-4). HPLC  $R_{\text{t}}$ : 6.923 min; HR-ESI(-)-MS:  $m/z$  305.0649  $[\text{M-H}]^-$  (Calculated for  $\text{C}_{15}\text{H}_{13}\text{O}_7$ , 305.0661).

Methyl gallate (**9**): white solid, UV (MeOH/ACN):  $\lambda_{\text{max}}$  271 nm;  $^1\text{H}$  NMR (400 MHz,  $\text{CD}_3\text{OD}$ ):  $\delta_{\text{H}}$  7.05 (2H, s, H-2',6'), 3.80 (3H, s, H-OCH<sub>3</sub>).  $^{13}\text{C}$  NMR (100 MHz,  $\text{CD}_3\text{OD}$ ):  $\delta_{\text{C}}$  169.05 (C=O), 146.44 (C-3 and C-5), 139.73 (C-4), 121.46 (C-1), 110.08 (C-2 and C-6), 52.29 (OCH<sub>3</sub>). HPLC  $R_{\text{t}}$ : 11.149 min; HR-ESI(-)-MS:  $m/z$  183.0291  $[\text{M-H}]^-$  (Calculated for  $\text{C}_8\text{H}_7\text{O}_5$ , 183.0293).

Kaempferol (**10**): yellow solid,  $^1\text{H}$  NMR (400 MHz,  $\text{CD}_3\text{OD}$ ):  $\delta_{\text{H}}$  7.86 (2H, d,  $J=8.8$  Hz, H-2',6'), 6.93 (2H, d,  $J=8.8$  Hz, H-3',5'), 6.38 (1H, d,  $J=2.2$  Hz, H-8), 6.17 (1H, d,  $J=2.4$  Hz, H-6).

Apigenin (**11**): greenish yellow solid,  $^1\text{H}$  NMR (400 MHz,  $\text{CD}_3\text{OD}$ ):  $\delta_{\text{H}}$  7.88 (2H, d,  $J=8.8$  Hz, H-2',6'), 6.96 (2H, d,  $J=8.8$  Hz, H-3',5'), 6.62 (1H, s, H-3), 6.48 (1H, d,  $J=2.1$  Hz, H-8), 6.23 (1H, d,  $J=2.1$  Hz, H-6).

Pinoresinol (**12**): grey solid, UV (MeOH/ACN):  $\lambda_{\text{max}}$  279 nm;  $^1\text{H}$  NMR (400 MHz,  $\text{CDCl}_3$ ):  $\delta_{\text{H}}$  6.89 (1H, d,  $J=1.7$  Hz, H-2/2'), 6.88 (1H, d,  $J=8.1$  Hz, H-5/5'), 6.82 (1H, dd,  $J=8.1$ , 1.7 Hz, H-6/6'), 5.6 (1H, s, OH), 4.74 (1H, d,  $J=4.3$  Hz, H-7/7'), 4.25 (1H, dd,  $J=9.0$ , 7.0 Hz, H-9 $\alpha$ /9' $\alpha$ ), 3.9 (3H, s, OCH<sub>3</sub>), 3.88 (1H,  $J=8.5$ , 3.0 Hz, H-9 $\beta$ /9' $\beta$ ), 3.1 (1H, m, H-8/8').  $^{13}\text{C}$  NMR (100 MHz,  $\text{CDCl}_3$ ):  $\delta_{\text{C}}$  146.8 (C-3/3'), 145.3 (C-4/4'), 133.0 (C-1/1'), 119.0 (C-6/6'), 114.3 (C-5/5'), 108.7 (C-2/2'), 85.9 (C-7/7'), 71.7 (C-9/9'), 56.0 (OCH<sub>3</sub>), 54.2 (C-8/8'). HPLC  $R_{\text{t}}$ : 20.707 min; HR-ESI(-)-MS:  $m/z$  357.1332  $[\text{M-H}]^-$  (Calculated for  $\text{C}_{20}\text{H}_{21}\text{O}_6$ , 357.1338).

(*E*)-Lutein (**13**): orange powder, UV (MeOH/ACN):  $\lambda_{\text{max}}$  445, 472 nm;  $^1\text{H}$  NMR (400 MHz,  $\text{CDCl}_3$ ):  $\delta_{\text{H}}$  6.67-6.57 (4H, m, H-11, H-11', H-15, H-15'), 6.35 (1H, d,  $J=14.8$  Hz, H-12, H-12'), 6.25 (2H, d,  $J=9.5$  Hz, H-14, H-14'), 6.11-6.17 (5H, m, H-7, 8, 8', 10, 10'), 5.54 (1H, brs, H-4'), 5.43 (1H, dd,  $J=15.2$ , 9.9 Hz, H-7'), 4.25 (1H, brs, H-3'eq), 4.00 (1H, m, H-3ax), 2.41 (1H, brs, H-6'), 2.39 (1H, brs, H-4eq), 2.05 (1H, brd, H-4ax), 1.97 (9H, s, CH<sub>3</sub>-19,20,20'), 1.91 (3H, s, CH<sub>3</sub>-19'), 1.84 (1H, dd,  $J=13.2$ , 5.8 Hz, H-2'eq), 1.78 (1H, brs, H-

2eq), 1.74 (3H, s, CH<sub>3</sub>-18), 1.63 (3H, s, CH<sub>3</sub>-18'), 1.48 (1H, brs, H-2ax), 1.37 (1H, dd, *J*=13.3, 6.7 Hz, H-2'ax), 1.07 (6H, s, CH<sub>3</sub>-16,17), 0.99 (3H, s, H-17'), 0.84 (3H, s, 16'). <sup>13</sup>C NMR (100 MHz, CDCl<sub>3</sub>): δ<sub>C</sub> 138.6 (C-8), 137.8 (C-6, 5'), 137.6 (C-12, 12', 8'), 136.5 (C-13, 13'), 135.9 (C-9), 135.1 (C-9'), 132.6 (C-14, 14'), 131.4 (C-10), 131.0 (C-7), 130.8 (C-10'), 130.1 (C-15, 15'), 128.8 (C-7'), 126.2 (C-5), 125.0 (C-11), 124.8 (C-11'), 124.5 (C-4'), 66.0 (C-3), 65.2 (C-3'), 55.0 (C-6'), 44.7 (C-2'), 42.6 (C-4), 37.1 (C-1), 34.1 (C-1'), 30.3 (C-16), 29.7 (C-2), 29.6 (C-17'), 28.8 (C-17), 24.4 (C-16'), 22.9 (C-20'), 22.7 (C-18'), 21.7 (C-19'), 14.1 (C-18), 13.1 (C-20), 12.8 (C-19). HPLC R<sub>t</sub>: 41.795 min; HR-ESI-(+)-MS *m/z* 568.4295 M<sup>+</sup> (Calculated for C<sub>40</sub>H<sub>56</sub>O<sub>2</sub>, 568.4280).

1-Heptacosanol (**14**): White amorphous solid, <sup>1</sup>H NMR (400 MHz, CDCl<sub>3</sub>): δ<sub>H</sub> 3.64 (2H, t, *J*=6.5 Hz, H-1), 1.56 (2H, m, H-2), 1.26 (46H, brs, H-3 – H-26), 0.88 (3H, t, *J*=6.8 Hz, H-27). <sup>13</sup>C NMR (100 MHz, CDCl<sub>3</sub>): δ<sub>C</sub> 63.2 (C-1), 32.9 (C-2), 32.0 (C-3), 29.4-29.8 (C4-24), 25.8 (C-25), 22.7 (C-26), 14.2 (C-27).

#### NMR and MS spectra of the new compounds

##### Elemental Composition Report

Page 1

##### Single Mass Analysis

Tolerance = 5.0 PPM / DBE: min = -1.5, max = 50.0

Element prediction: Off

Number of isotope peaks used for i-FIT = 3

Monoisotopic Mass, Even Electron Ions

2 formula(e) evaluated with 1 results within limits (all results (up to 1000) for each mass)

Elements Used:

C: 20-25 H: 20-25 O: 5-10

NT-V 2\_5 12 (0.387) Cm (1:58)

TOF MS ES+

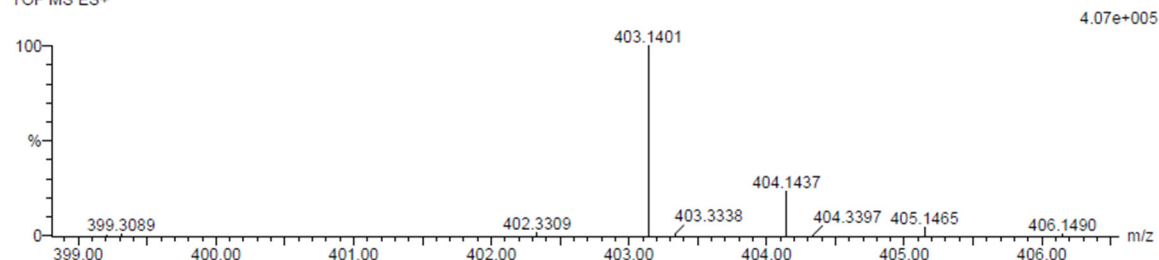

| Minimum: |            |     |     | -1.5 |       |              |            |
|----------|------------|-----|-----|------|-------|--------------|------------|
| Maximum: |            | 5.0 | 5.0 | 50.0 |       |              |            |
| Mass     | Calc. Mass | mDa | PPM | DBE  | i-FIT | i-FIT (Norm) | Formula    |
| 403.1401 | 403.1393   | 0.8 | 2.0 | 10.5 | 47.1  | 0.0          | C21 H23 O8 |

**Figure S1.** HRESIMS of 3,7,8,2',4',5'-hexamethoxyflavone (**1**).

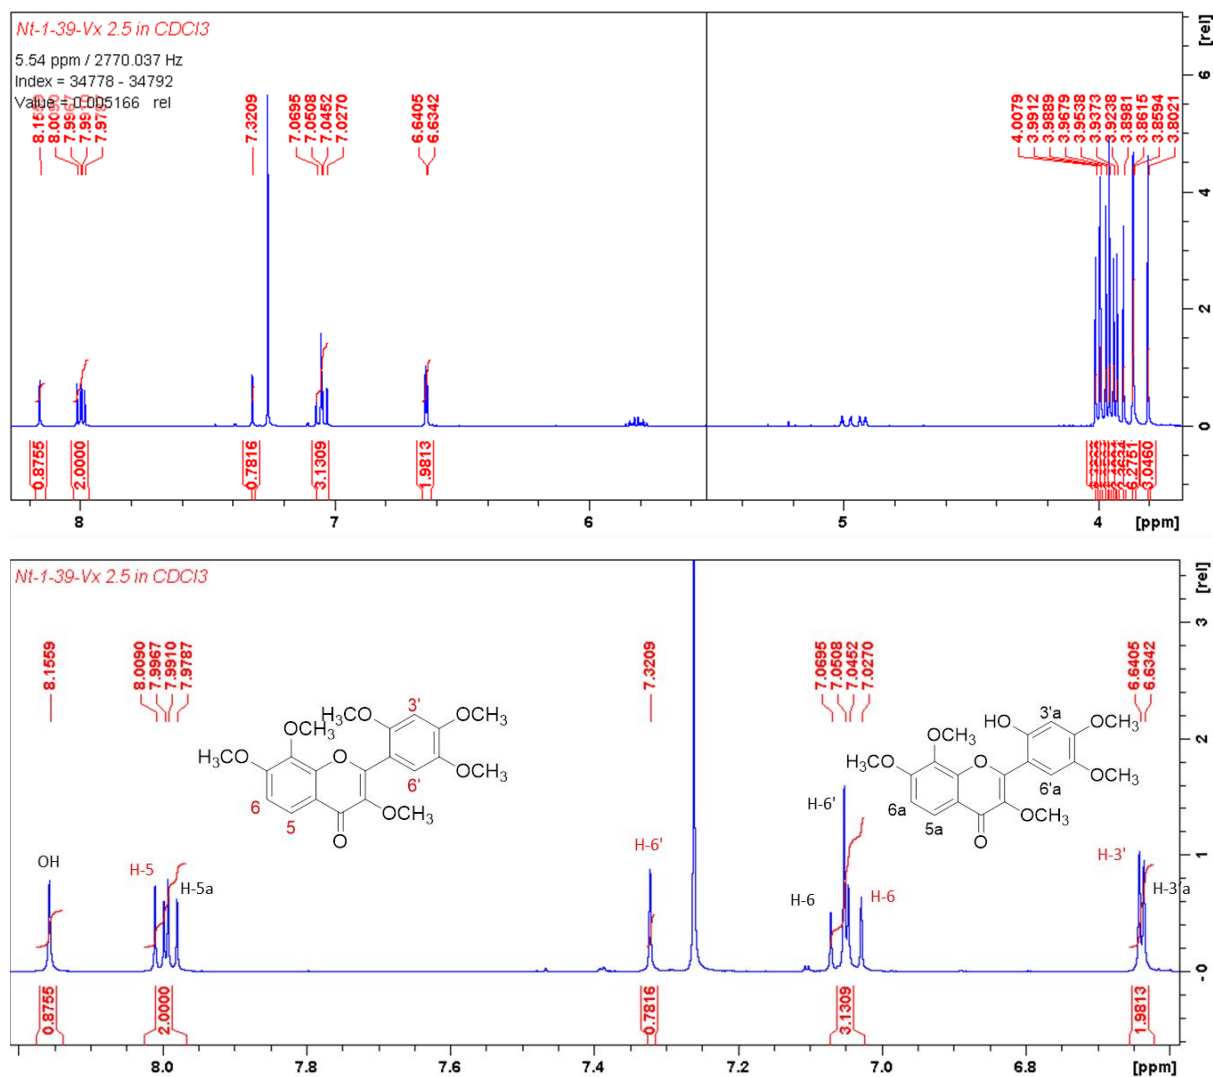

**Figure S2.** <sup>1</sup>H NMR spectrum of 3,7,8,2',4',5'-hexamethoxyflavone and 2'-hydroxy-3,7,8,4',5'-pentamethoxyflavone (**1** and **2**).

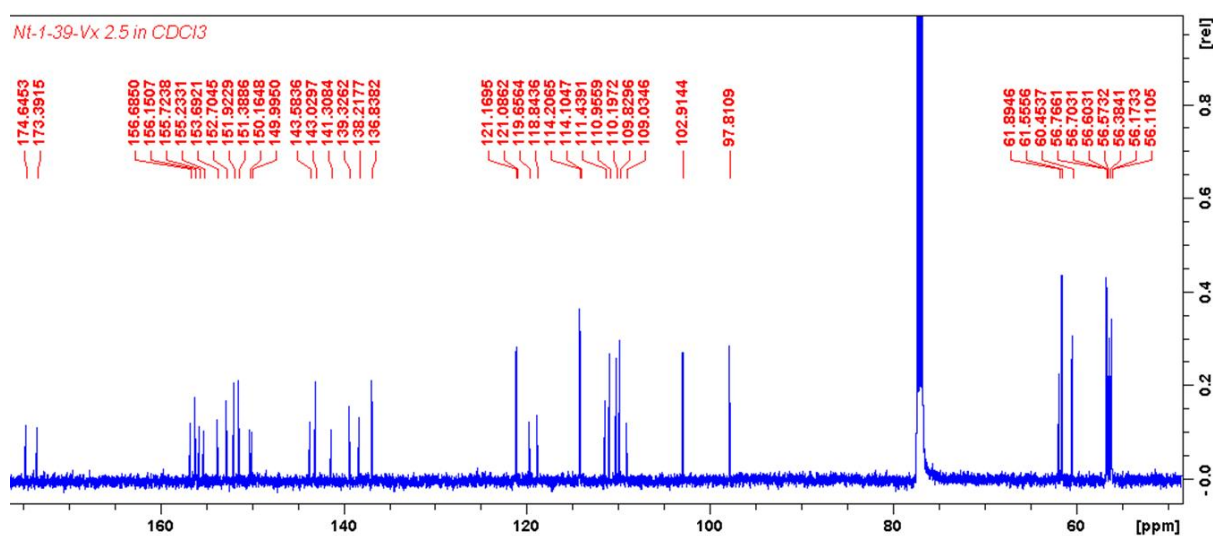

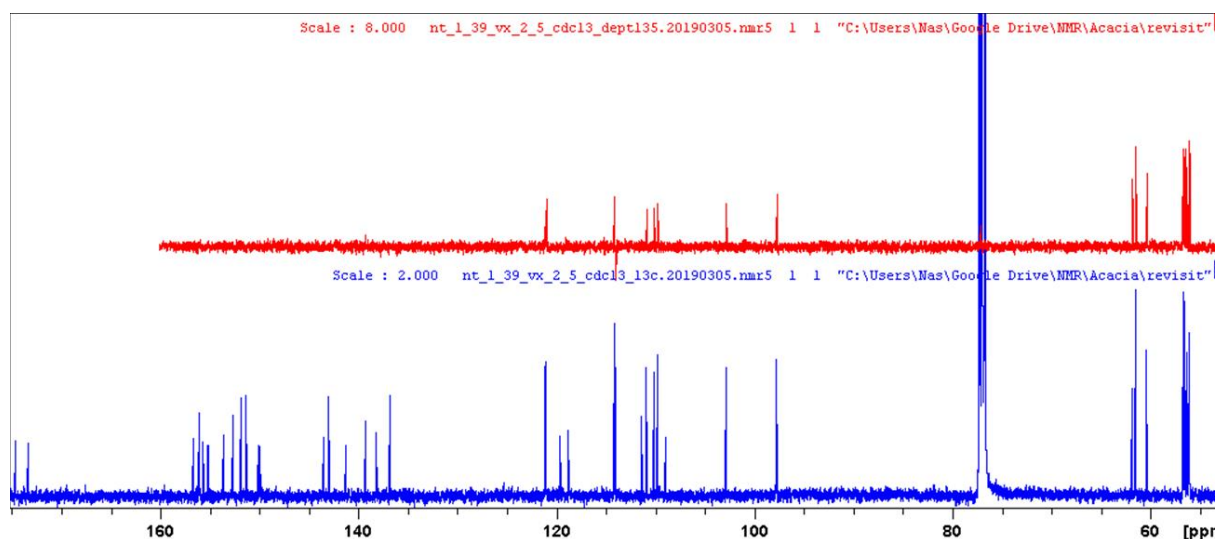

**Figure S3.**  $^{13}\text{C}$  and DEPT spectra of 3,7,8,2',4',5'-hexamethoxyflavone and 2'-hydroxy-3,7,8,4',5'-pentamethoxyflavone (**1** and **2**).

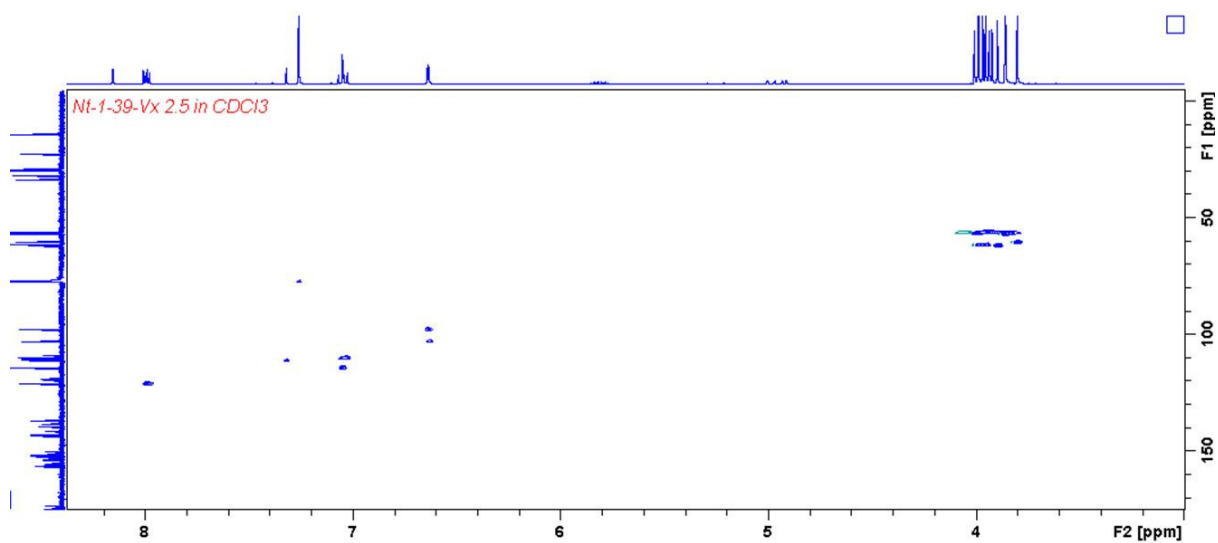

**Figure S4.** HSQC spectrum of 3,7,8,2',4',5'-hexamethoxyflavone and 2'-hydroxy-3,7,8,4',5'-pentamethoxyflavone (**1** and **2**).

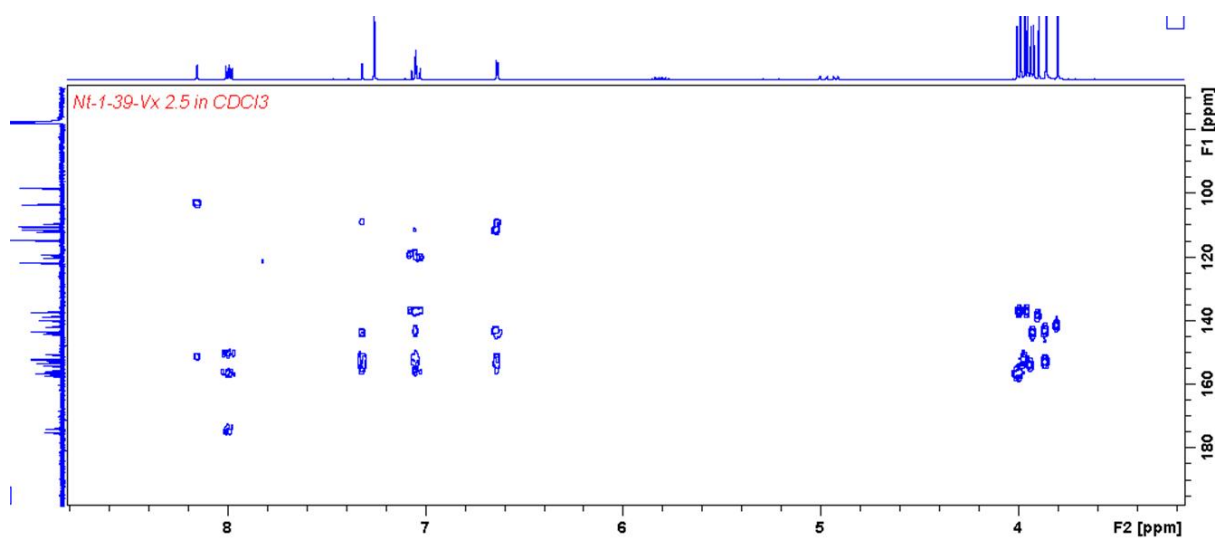

**Figure S5.** HMBC spectrum of 3,7,8,2',4',5'-hexamethoxyflavone and 2'-hydroxy-3,7,8,4',5'-pentamethoxyflavone (**1** and **2**).

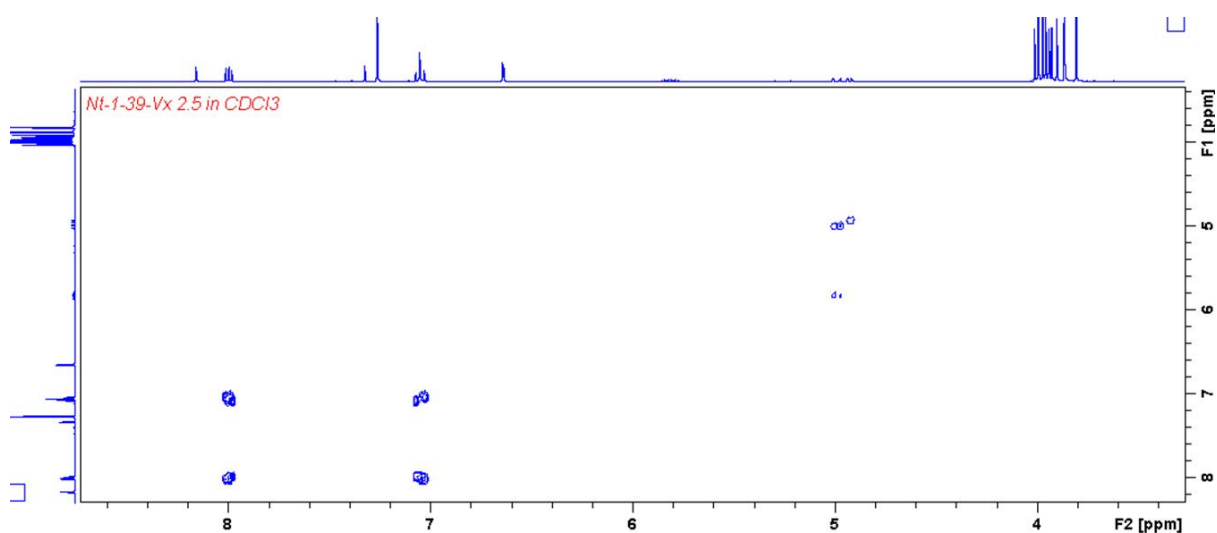

**Figure S6.** COSY spectrum of 3,7,8,2',4',5'-hexamethoxyflavone and 2'-hydroxy-3,7,8,4',5'-pentamethoxyflavone (**1** and **2**).

## Single Mass Analysis

Tolerance = 5.0 PPM / DBE: min = -1.5, max = 100.0

Element prediction: Off

Number of isotope peaks used for i-FIT = 3

Monoisotopic Mass, Even Electron Ions

14 formula(e) evaluated with 1 results within limits (all results (up to 1000) for each mass)

Elements Used:

C: 15-30 H: 15-30 O: 0-10

Vx 2.7b2 32 (1.046) Cm (1.61)

TOF MS ES-

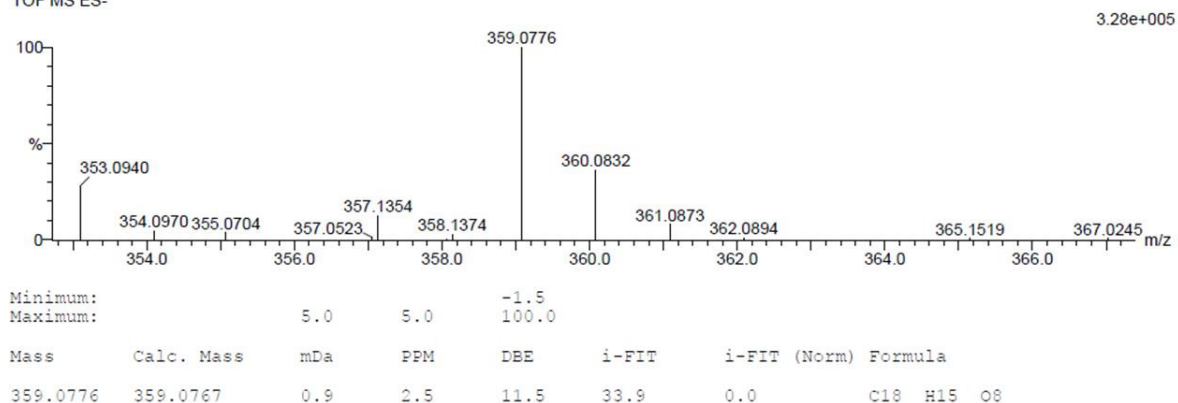

Figure S7. HRESIMS of 5,7,2'-trihydroxy-3,4',5'-trimethoxyflavone (3).

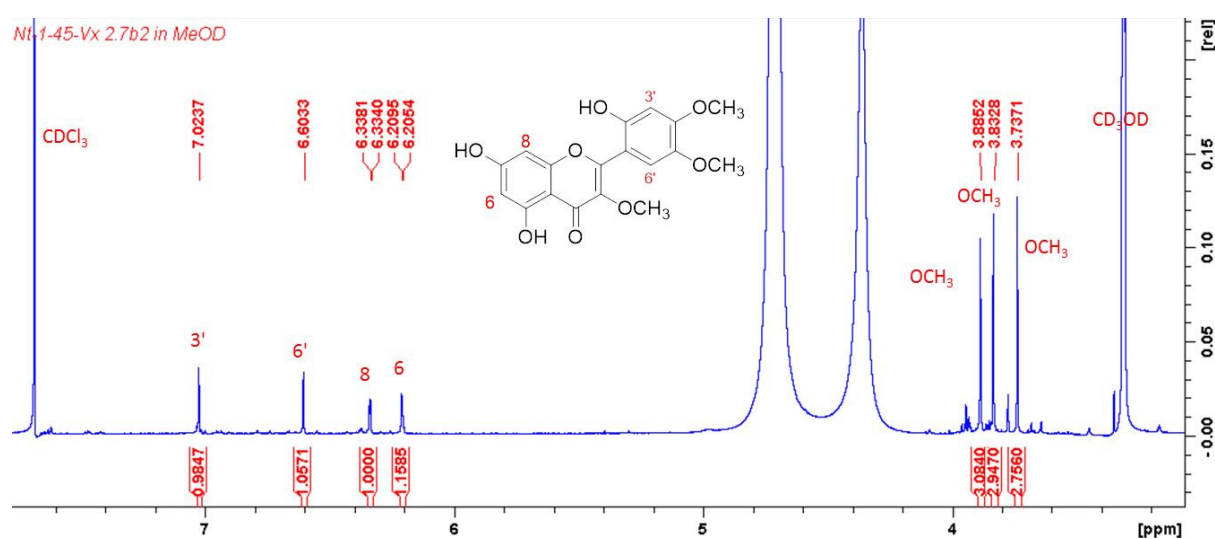Figure S8. <sup>1</sup>H NMR Spectrum of 5,7,2'-trihydroxy-3,4',5'-trimethoxyflavone (3).

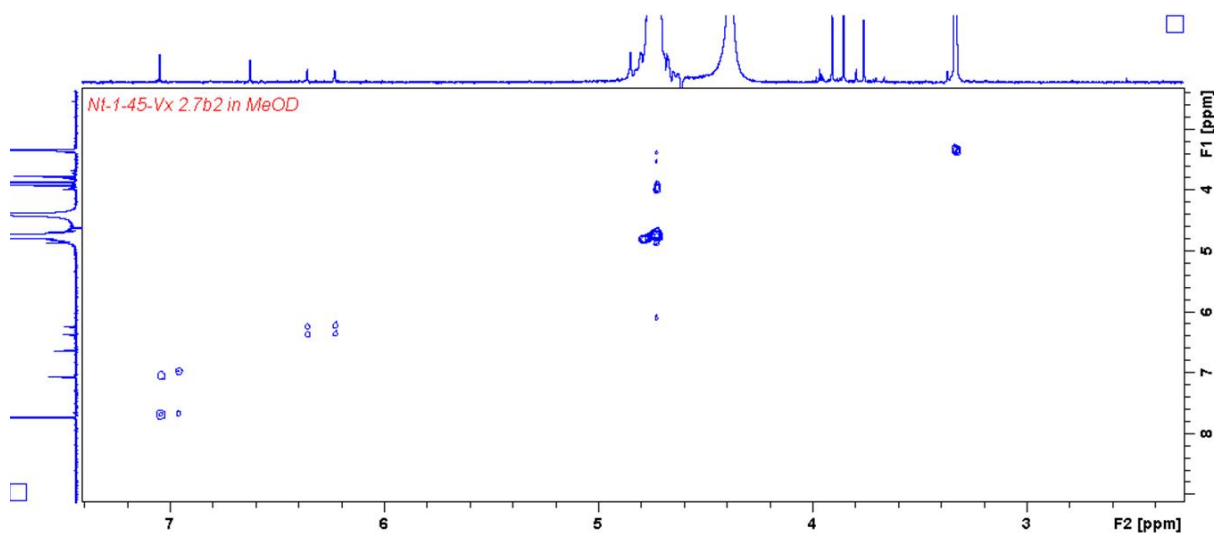

**Figure S9.** COSY Spectrum of 5,7,2'-trihydroxy-3,4',5'-trimethoxyflavone (**3**).

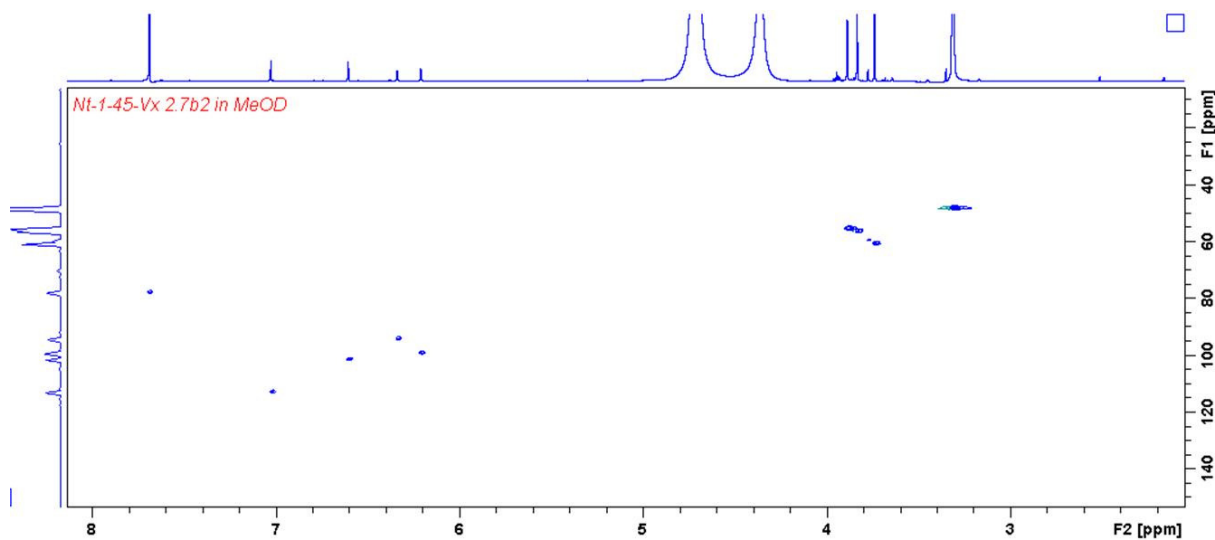

**Figure S10.** HSQC spectrum of 5,7,2'-trihydroxy-3,4',5'-trimethoxyflavone (**3**).

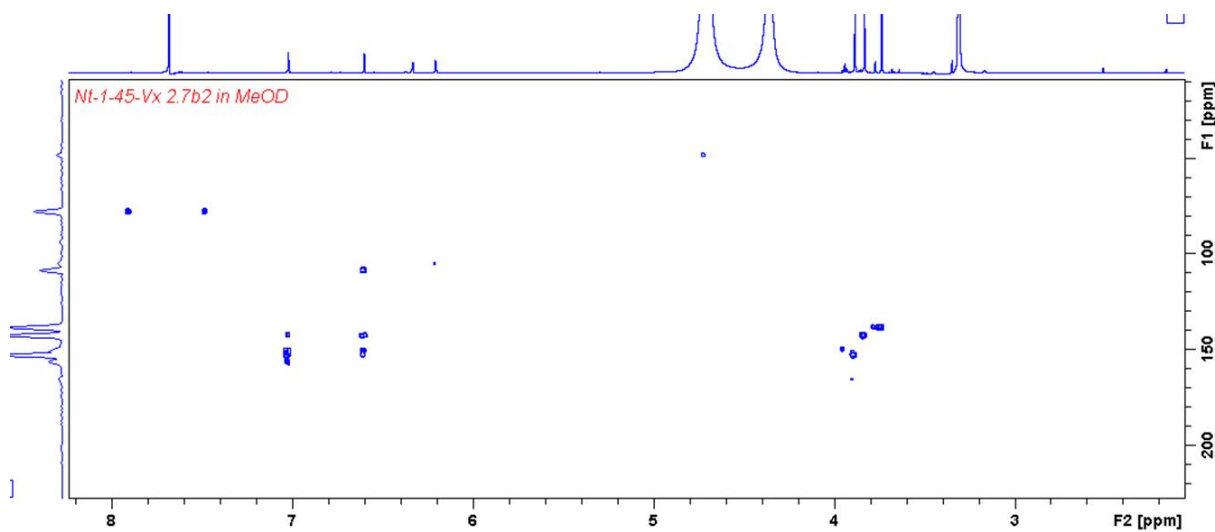

**Figure S11.** HMBC Spectrum of 5,7,2'-trihydroxy-3,4',5'-trimethoxyflavone (**3**).



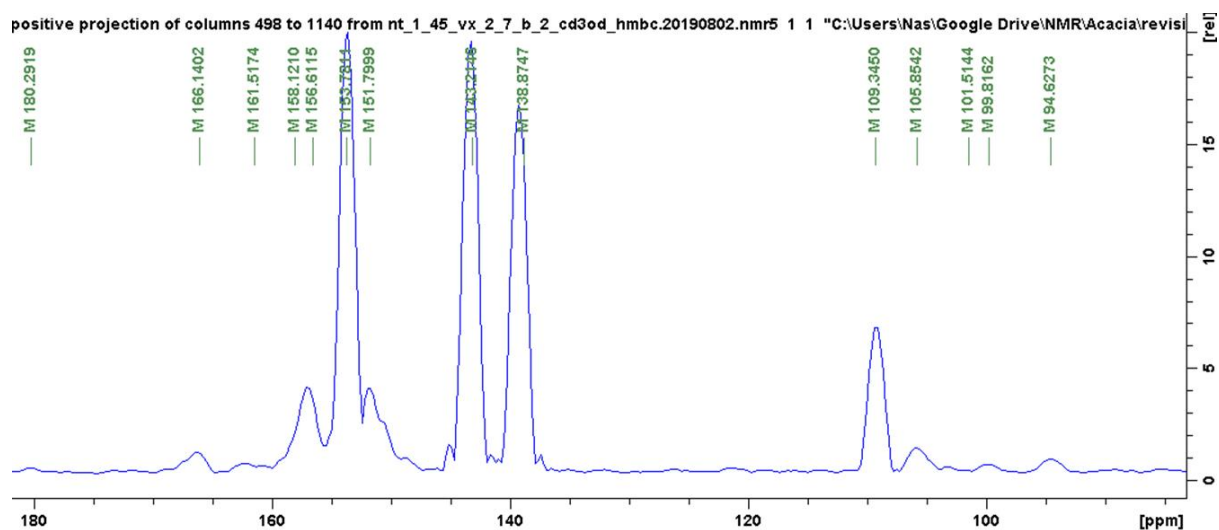

**Figure S12.**  $^{13}\text{C}$  Spectrum (positive projection from HMBC) of 5,7,2'-trihydroxy-3,4',5'-trimethoxyflavone (3).

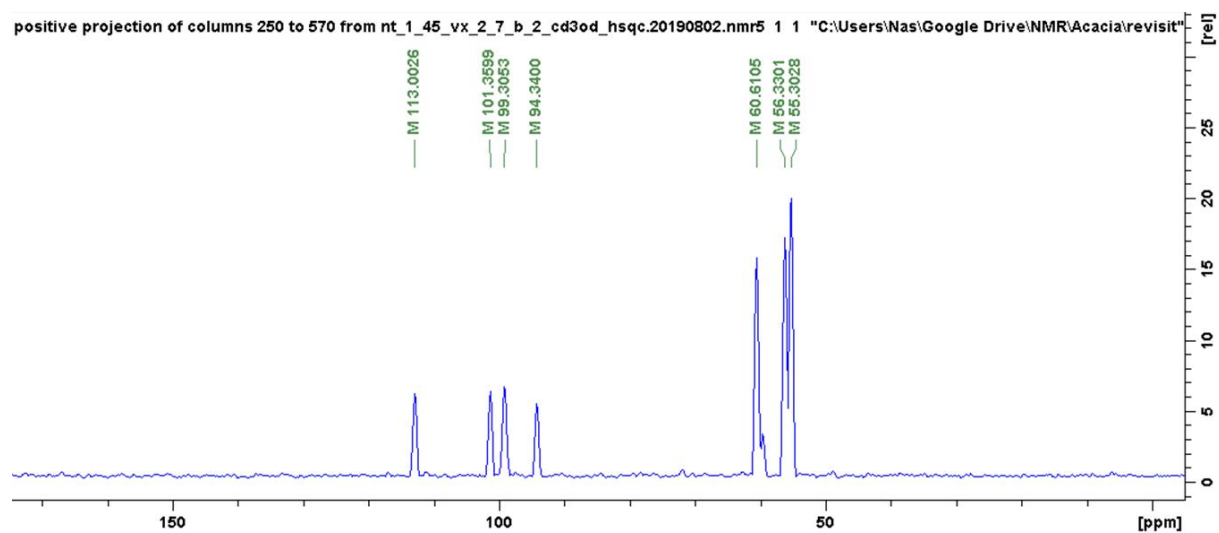

**Figure S13.**  $^{13}\text{C}$  Spectrum (positive projection from HSQC) of 5,7,2'-trihydroxy-3,4',5'-trimethoxyflavone (3).
